# Supplementary material for: Electronic structure, colour-tunable emission and energy transfer in Li3Ba2Y3(WO4)8:Bi3+,Eu3+ phosphors for white light-emitting diodes
Source: Royal Society of Chemistry journal article supplement (doi:10.1039/d4dt02121e), 2024-01-01
Supplement: d4dt02121e1.pdf [file d4dt02121e1.pdf]

## Supporting Information

### **Electronic structure, colour-tunable emission and energy transfer in $\text{Li}_3\text{Ba}_2\text{Y}_3(\text{WO}_4)_8:\text{Bi}^{3+},\text{Eu}^{3+}$ phosphors for white light-emitting diodes**

Junqiang Gu<sup>a</sup>, Feiyan Xie<sup>a,b</sup>, HuaJiang Yu<sup>a</sup>, Shengqian Wang<sup>a</sup>, Chaochao Tao<sup>a</sup>, Houfa Mao<sup>a</sup>, Shuo Wang<sup>a</sup>, Hualan Xu<sup>a\*</sup>, Shengliang Zhong<sup>a\*</sup>

<sup>a</sup> Key Lab of Porous Functional Materials of Jiangxi Province, College of Chemistry and Materials, Jiangxi Normal University, Nanchang 330022, China

<sup>b</sup>School of Chemistry and Materials Engineering, Huizhou University, Huizhou 516007, China

## Materials and synthesis

A series of phosphors including  $\text{Li}_3\text{Ba}_2\text{Y}_3(\text{WO}_4)_8$  (abbreviated as LBYW),  $\text{LBYW}:x\text{Bi}^{3+}$  ( $x = 2\%, 4\%, 6\%, 8\%, 10\%$ ),  $\text{LBYW}:y\text{Eu}^{3+}$  ( $y = 2\%, 4\%, 6\%, 8\%, 10\%$ ) and  $\text{LBYW}:4\%\text{Bi}^{3+},y\text{Eu}^{3+}$  ( $y = 2\%, 4\%, 6\%, 8\%, 10\%$ ) were prepared by traditional high temperature solid state reaction method. For raw materials  $\text{Li}_2\text{CO}_3$  (A.R. 99%),  $\text{BaCO}_3$  (A.R. 99%),  $\text{Y}_2\text{O}_3$  (A.R. 99%),  $\text{WO}_3$  (A.R. 99.99%),  $\text{Bi}_2\text{O}_3$  (A.R. 99.99%) and  $\text{Eu}_2\text{O}_3$  (A.R. 99.99%) were stoichiometric weighed and fully mixed in agate mortar, then the mixture was transferred to the  $\text{Al}_2\text{O}_3$  crucible and pre-burned at 873 K for 1 h. After cooling, the powder was re-ground and sintered at 1173 K for 10 h. Eventually, it was naturally cooled to room temperature to obtain the final product for subsequent studies.

## Measurements and characterization

The X-ray diffraction (XRD) analyses of the samples were conducted using a  $\text{Cu-K}\alpha$  source with settings of 40 kV and 40 mA ( $\lambda = 1.54178 \text{ \AA}$ ) on a Rigaku/Max-3A x-ray diffractometer, covering a scan range from 5 to 80 degrees ( $2\theta$ ) at a rate of 20 degrees per minute. For detailed Rietveld structural refinement, scans were extended from 5 to 120 degrees at a slower rate of 1 degree per minute. The morphology and energy dispersive spectroscopy (EDS) of the samples were measured by Hitachi S-3400N scanning electron microscopy (SEM), and the element mapping was analyzed by TESCANCLARA Field emission scanning electron microscopy (FE-SEM). Diffuse reflectance spectra (UV-vis DRS) were obtained using a U-3310 UV-vis spectrophotometer, with  $\text{BaSO}_4$  serving as the reference. Bi ions valence states were explored through X-ray photoelectron spectroscopy (XPS) on a Thermo Scientific AXIS SUPRA, utilizing a monochromatic Al  $\text{K}\alpha$  radiation source. Photoluminescence (PL) emission and excitation (PLE) spectra, along with decay curves were recorded on an Edinburgh Instruments FLS 980 time-resolved steady-state fluorescence spectrometer, equipped with Xe/nF/ $\mu\text{F}$  lamps. Temperature-dependent emission spectra were captured using an Edinburgh FLS 1000 spectrometer, supplemented with an Oxford temperature controller. CIE coordinates were calculated based on emission spectra and according to the CIE1931 colorimetric system. The prepared white LED

device was assembled by coating a mixture of synthesized LBYW:4%B<sup>3+</sup>,4%E<sup>3+</sup> phosphor and commercial BaMgAl<sub>10</sub>O<sub>17</sub>:Eu<sup>2+</sup> blue phosphor (20:1 mass ratio) onto a 365 nm UV chip. The device's performance was evaluated using an OHSP-350M LED Fast-Scan Spectrophotometer (350-1050 nm), produced by Hangzhou Hopoo Light & Color Technology.

### **DFT calculation**

First-principles calculations based on Plane-wave pseudopotential density functional theory (DFT) were performed on the substrate of LBYW and Bi<sup>3+</sup> single-doped and Bi<sup>3+</sup>,Eu<sup>3+</sup> co-doped materials. The geometric optimization, electronic structure and state density were calculated using the generalized gradient correction PBE function. A 4×2×1 k-point grid in the Brillouin zone was used under the GAMMMER scheme. The kinetic energy cutoff and self-consistent field tolerance are set to 500 eV and  $1 \times 10^{-4}$  eV atom<sup>-1</sup>, and the force received by each atom is less than 0.05 eV/Å. In addition, the electronic structures of Bi<sup>3+</sup> single-doped and Bi<sup>3+</sup>,Eu<sup>3+</sup> co-doped Li<sub>3</sub>Ba<sub>2</sub>Y<sub>3</sub>(WO<sub>4</sub>)<sub>8</sub> have been studied using PBE and PBE U with different U values. It is found that when the U values of Y, W and Eu are 2.0, 3.6 and 6.0 respectively, a good agreement can be achieved with experimental results.

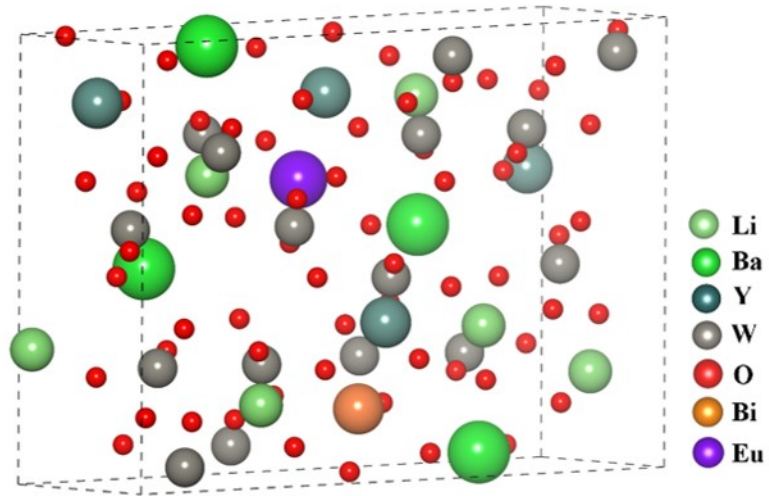

Figure S1. LBYW matrix model doped with  $\text{Bi}^{3+}$  and  $\text{Bi}^{3+}/\text{Eu}^{3+}$ .

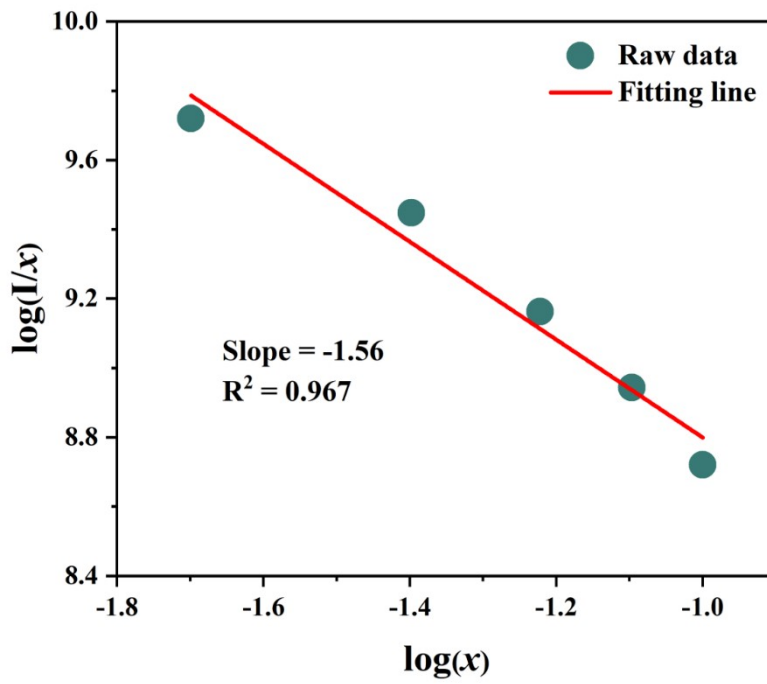

Figure S2. The plot of  $\log(I/x)$  versus  $\log(x)$  for  $\text{LBYW}:x\text{Bi}^{3+}$  phosphors.

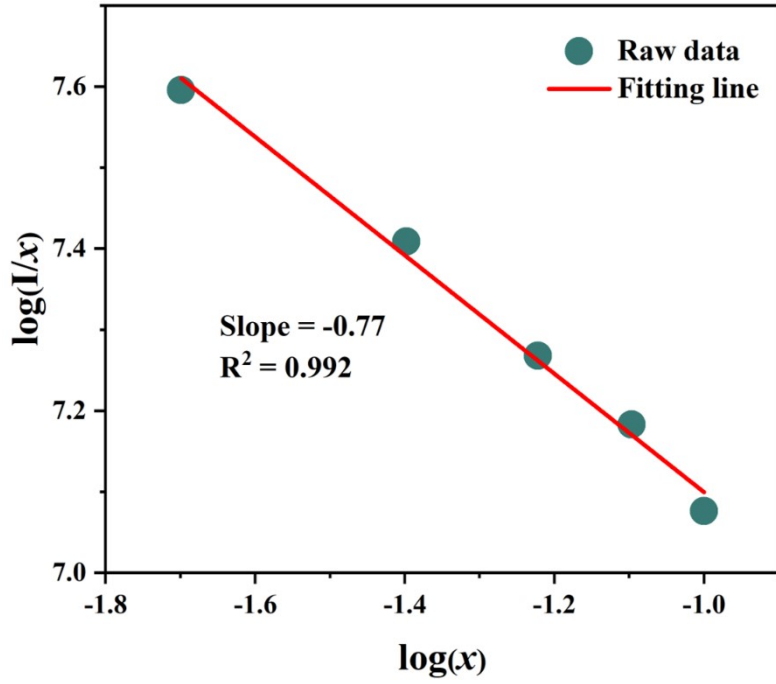

Figure S3. The plot of  $\log(I/x)$  versus  $\log(x)$  for LBYW:yEu<sup>3+</sup> phosphors.

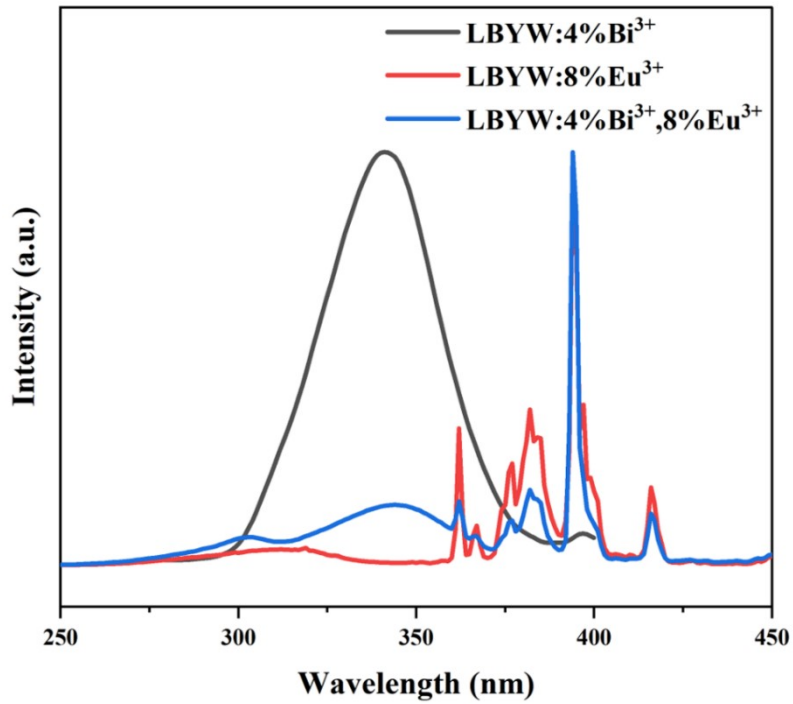

Figure S4. Excitation spectra of LBYW:4%Bi<sup>3+</sup> ( $\lambda_{em} = 553$  nm), LBYW:8%Eu<sup>3+</sup> ( $\lambda_{em} = 614$  nm) and LBYW:4%Bi<sup>3+</sup>,8%Eu<sup>3+</sup> ( $\lambda_{em} = 614$  nm).

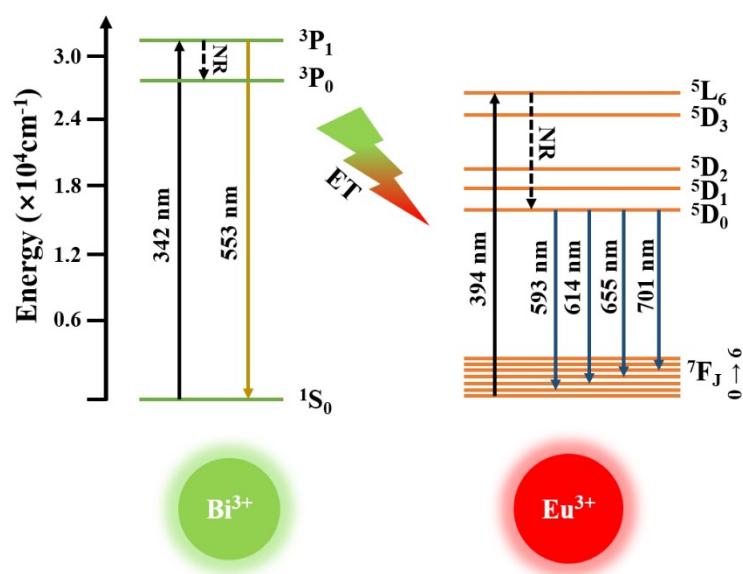

Figure S5. Schematic diagram of the  $\text{Bi}^{3+} \rightarrow \text{Eu}^{3+}$  ET of  $\text{LBYW}:\text{Bi}^{3+}, \text{Eu}^{3+}$  phosphors.

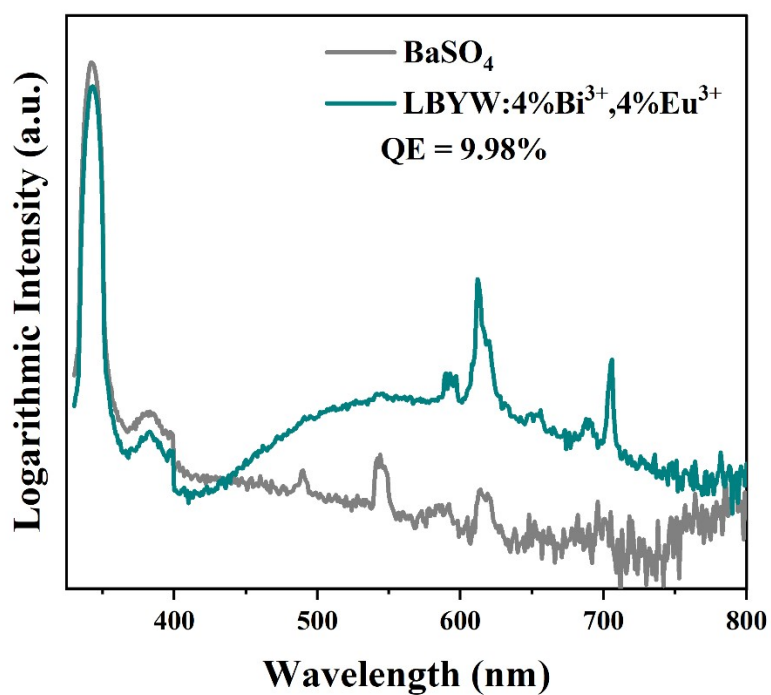

Figure S6. Quantum efficiency of  $\text{LBYW}:\text{4\%Bi}^{3+}, \text{4\%Eu}^{3+}$  phosphor.

Table S1. Rietveld refinement and lattice parameters of LBYW:4%B<sup>3+</sup> and LBYW:4%B<sup>3+</sup>,4%Eu<sup>3+</sup> phosphors.

| Formula             | LBYW:4%B <sup>3+</sup> | LBYW:4%B <sup>3+</sup> ,4%Eu <sup>3+</sup> |
|---------------------|------------------------|--------------------------------------------|
| Space group         | C2/c                   | C2/c                                       |
| a (Å)               | 5.1775                 | 5.1803                                     |
| b (Å)               | 12.664                 | 12.673                                     |
| c (Å)               | 19.140                 | 19.160                                     |
| alpha(°)            | 90.000                 | 90.000                                     |
| beta(°)             | 92.142                 | 92.160                                     |
| gama(°)             | 90.000                 | 90.000                                     |
| units,Z             | 2                      | 2                                          |
| V (Å <sup>3</sup> ) | 1254.16                | 1256.27                                    |
| R <sub>wp</sub> (%) | 9.03                   | 9.93                                       |
| R <sub>p</sub> (%)  | 5.34                   | 5.91                                       |
| χ <sup>2</sup>      | 1.45                   | 1.43                                       |

Table S2. The CIE coordinates of the LBYW:4%B<sup>3+</sup>,yEu<sup>3+</sup> (y = 0, 2%, 4%, 6%, 8%, 10%) phosphors.

| LBYW:4%B <sup>3+</sup> ,yEu <sup>3+</sup> | (x, y)           |
|-------------------------------------------|------------------|
| y = 0                                     | (0.3731, 0.4684) |
| y = 2%                                    | (0.4256, 0.4412) |
| y = 4%                                    | (0.4661, 0.4247) |
| y = 6%                                    | (0.4848, 0.4152) |
| y = 8%                                    | (0.4920, 0.4087) |
| y = 10%                                   | (0.5042, 0.4062) |
